# Supplementary material for: Internet Use for Searching Information on Medicines and Disease: A Community Pharmacy–Based Survey Among Adult Pharmacy Customers
Source: PubMed Central journal article supplement (PMC4988641; doi:10.2196/ijmr.5231), 2016-07-13
Supplement: ijmr_v5i3e22_app1.pdf [file ijmr_v5i3e22_app1.pdf]

**FARMACI E INTERNET:  
INDAGINE SU MEDICINALI, INTEGRATORI ALIMENTARI E WEB**

**Parte I – Dati personali**

- 1.1 Sesso:  M  F Età: \_\_\_\_\_
- 1.2 Stato civile: \_\_\_\_\_
- 1.3 Ha figli?  Si  No
- 1.4 Qual è il suo titolo di studio? \_\_\_\_\_
- 1.5 Qual è la sua occupazione? \_\_\_\_\_
- 1.6 Qual è il suo luogo di residenza? \_\_\_\_\_

**Parte II – Uso di farmaci e di integratori alimentari**

- 2.1 Negli ultimi sei mesi ha utilizzato:  
**FARMACI?**  Si  No  
**INTEGRATORI?**  Si  No

**Parte III – Internet**

- 3.1 Ha mai comprato in Internet?  
 Si  No

- 3.2 Ha mai cercato informazioni su una malattia in Internet?  
 Si  No

Se sì, per quale/i? \_\_\_\_\_  
Se sì, è rimasto/a soddisfatto/a? \_\_\_\_\_

- 3.3 Ha mai cercato informazioni su un farmaco e/o un integratore alimentare in Internet?  
 Si  No

Se sì, per quale/i? \_\_\_\_\_  
Se sì, è rimasto/a soddisfatto/a? \_\_\_\_\_

- 3.4 E' a conoscenza della vendita dei farmaci in Internet?  
 Si  No

Che cosa ne pensa? \_\_\_\_\_  
\_\_\_\_\_

- 3.5 E' a conoscenza della vendita degli integratori alimentari in Internet?  
 Si  No

Che cosa ne pensa? \_\_\_\_\_  
\_\_\_\_\_

## Progetto di ricerca: **FARMACI E INTERNET: INDAGINE SU MEDICINALI, INTEGRATORI ALIMENTARI E WEB**

Gent.ma Signora, Egr. Signore:

La invitiamo a partecipare a un progetto che intende investigare sui fattori che inducono all'acquisto di un farmaco e/o un integratore alimentare.

Il progetto è coordinato dalla Dr.ssa Simona Lombardo, la quale sta frequentando il Corso di Dottorato di Ricerca in Farmacologia Sperimentale e Clinica presso il Dipartimento di Medicina Clinica dell'Università degli Studi dell'Insubria di Varese.

La partecipazione al progetto consisterà nella compilazione del questionario allegato a questa lettera. Il questionario è anonimo e in nessun modo le risposte fornite potranno essere ricondotte alla sua persona.

La ringraziamo anticipatamente per la sua preziosa collaborazione.

Distinti saluti

La responsabile del progetto  
Dr.ssa Simona Lombardo

Il docente-guida  
Prof. Marco Cosentino

---

*Per informazioni e chiarimenti:*

**Dr.ssa Simona Lombardo**

Dipartimento di Medicina Clinica

Sezione di Farmacologia Sperimentale e Clinica

Università degli Studi dell'Insubria

Via Ottorino Rossi n. 9

21100 Varese VA

Tel. (segreteria): +39 0332 217401/397401

Fax: +39 0332 217409/397409

E-mail: [simona.lombardo@uninsubria.it](mailto:simona.lombardo@uninsubria.it)

---

### **Consenso alla partecipazione e al trattamento dei dati personali.**

Il/la sottoscritto/a (nome e cognome) \_\_\_\_\_  
esprime il proprio consenso alla partecipazione al progetto nonché al  
trattamento dei propri dati nel pieno rispetto del D.L.vo n. 196/2003 e norme  
successive.

Luogo e data \_\_\_\_\_

Firma \_\_\_\_\_
